# Supplementary material
Source: Research Square preprint supplement (doi:10.21203/rs.3.rs-9454069/v1)
Supplement: Supplementary file 1 [file b118633e6d2970b16181cdea.docx]

# Appendix A. Reproducibility Details

## A.1 Baseline hyperparameters

To forestall unfair-baseline concerns, MPC and CC-CV baselines were tuned by preliminary grid search on held-out cycles with the following outcomes: MPC voltage-error gain k_p = 10 A/V (chosen from {5, 10, 20, 50}), MPC current rate limit ΔI_max = 0.5 A/s, CC-CV CV-phase proportional gain kp = I_target/0.10 V. K-R ridge regularization λ = 10⁻⁴, training window 60 samples, retrain interval 10 s, hidden dimension 16 (matched to prior K-R wireless-receiver work). All hyperparameters are held constant across scenarios and cells.

## A.2 Full paired-t-test results (K-R vs K-only)

| Cell | Scen | Metric | Mean Δ | Rel % | Cohen's d | p | Sig |
| --- | --- | --- | --- | --- | --- | --- | --- |
| DS1 | S1 | OV | -6.39 | -25.9% | -1.52 | 1.65e-06 | *** |
| DS1 | S1 | RMSE_V | +9.42 | +7.0% | +114.31 | 8.73e-41 | *** |
| DS1 | S1 | eff | +0.00 | +0.1% | +50.27 | 5.23e-34 | *** |
| DS1 | S1 | t80 | +52.90 | +3.1% | +82.56 | 4.22e-38 | *** |
| DS1 | S3 | OV | -34.15 | -15.7% | -11.12 | 1.39e-21 | *** |
| DS1 | S3 | RMSE_V | -28.26 | -24.0% | -310.80 | 4.88e-49 | *** |
| DS1 | S3 | eff | +0.00 | +0.5% | +410.18 | 2.50e-51 | *** |
| DS1 | S3 | t80 | +315.90 | +18.8% | +706.37 | 8.20e-56 | *** |
| DS1 | S5 | OV | -28.66 | -29.3% | -10.20 | 7.05e-21 | *** |
| DS1 | S5 | RMSE_V | +20.90 | +18.6% | +498.81 | 6.09e-53 | *** |
| DS1 | S5 | eff | +0.00 | +0.5% | +506.39 | 4.57e-53 | *** |
| DS1 | S5 | t80 | +251.95 | +18.7% | +1126.75 | 1.15e-59 | *** |
| DS2 | S1 | OV | -6.39 | -26.3% | -2.14 | 1.10e-08 | *** |
| DS2 | S1 | RMSE_V | +11.68 | +7.9% | +98.53 | 1.47e-39 | *** |
| DS2 | S1 | eff | +0.00 | +0.1% | +56.35 | 5.98e-35 | *** |
| DS2 | S1 | t80 | +73.50 | +4.4% | +69.91 | 9.95e-37 | *** |
| DS2 | S3 | OV | -36.49 | -16.8% | -11.48 | 7.59e-22 | *** |
| DS2 | S3 | RMSE_V | -24.15 | -19.5% | -301.37 | 8.76e-49 | *** |
| DS2 | S3 | eff | +0.01 | +0.6% | +693.97 | 1.15e-55 | *** |
| DS2 | S3 | t80 | +333.90 | +19.9% | +746.62 | 2.86e-56 | *** |
| DS2 | S5 | OV | -29.33 | -30.0% | -7.37 | 3.13e-18 | *** |
| DS2 | S5 | RMSE_V | +23.46 | +18.9% | +513.14 | 3.55e-53 | *** |
| DS2 | S5 | eff | +0.01 | +0.6% | +750.80 | 2.57e-56 | *** |
| DS2 | S5 | t80 | +266.05 | +19.8% | +675.19 | 1.93e-55 | *** |
| DS5 | S1 | OV | -5.63 | -23.8% | -2.73 | 1.94e-10 | *** |
| DS5 | S1 | RMSE_V | +8.89 | +6.6% | +52.84 | 2.03e-34 | *** |
| DS5 | S1 | eff | +0.00 | +0.0% | +24.59 | 4.12e-28 | *** |
| DS5 | S1 | t80 | +49.00 | +2.9% | +39.00 | 6.51e-32 | *** |
| DS5 | S3 | OV | -33.17 | -15.3% | -11.52 | 7.02e-22 | *** |
| DS5 | S3 | RMSE_V | -29.66 | -24.6% | -281.17 | 3.27e-48 | *** |
| DS5 | S3 | eff | +0.00 | +0.5% | +424.09 | 1.33e-51 | *** |
| DS5 | S3 | t80 | +311.70 | +18.6% | +474.47 | 1.58e-52 | *** |
| DS5 | S5 | OV | -27.72 | -28.4% | -10.13 | 7.97e-21 | *** |
| DS5 | S5 | RMSE_V | +20.22 | +17.9% | +595.97 | 2.07e-54 | *** |
| DS5 | S5 | eff | +0.00 | +0.5% | +544.49 | 1.15e-53 | *** |
| DS5 | S5 | t80 | +248.75 | +18.5% | +559.92 | 6.77e-54 | *** |
| DS7 | S1 | OV | -6.25 | -25.9% | -1.49 | 2.24e-06 | *** |
| DS7 | S1 | RMSE_V | +9.71 | +7.4% | +46.11 | 2.70e-33 | *** |
| DS7 | S1 | eff | +0.00 | +0.1% | +22.09 | 3.15e-27 | *** |
| DS7 | S1 | t80 | +56.85 | +3.4% | +35.56 | 3.74e-31 | *** |
| DS7 | S3 | OV | -35.24 | -16.1% | -9.36 | 3.55e-20 | *** |
| DS7 | S3 | RMSE_V | -28.30 | -24.8% | -312.33 | 4.44e-49 | *** |
| DS7 | S3 | eff | +0.00 | +0.5% | +354.62 | 3.98e-50 | *** |
| DS7 | S3 | t80 | +318.95 | +19.0% | +624.88 | 8.42e-55 | *** |
| DS7 | S5 | OV | -28.66 | -29.4% | -9.95 | 1.11e-20 | *** |
| DS7 | S5 | RMSE_V | +21.07 | +19.5% | +548.09 | 1.02e-53 | *** |
| DS7 | S5 | eff | +0.00 | +0.4% | +676.70 | 1.85e-55 | *** |
| DS7 | S5 | t80 | +254.50 | +18.9% | +496.11 | 6.75e-53 | *** |

## A.3 Reproducibility — software versions

All code is pure Python 3.12; only numpy (≥2.0), scipy, matplotlib, python-docx, and h5py are required. A random seed schedule is used so that re-running any experiment reproduces the reported numbers bit-for-bit. Total wall-clock time to reproduce all 960 main-grid simulations plus the stress experiments on a single-core CPU is approximately 15 minutes.
